# Supplementary material for: Identification of the circRNA–miRNA–mRNA network for treating methamphetamine‐induced relapse and behavioral sensitization with cannabidiol
Source: PubMed Central journal article supplement (PMC11069028; doi:10.1111/cns.14737), 2024-05-03

# Full unedited blot for Figure 6G (n = 5)

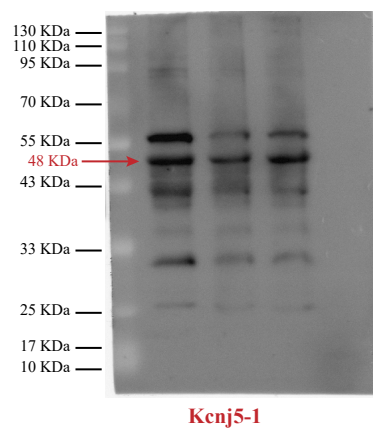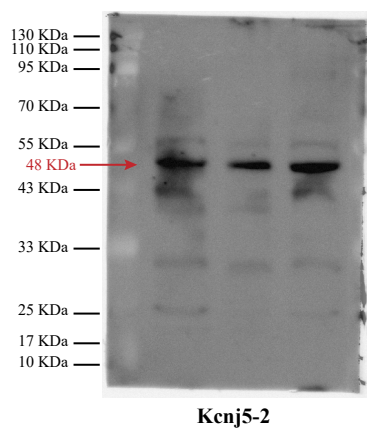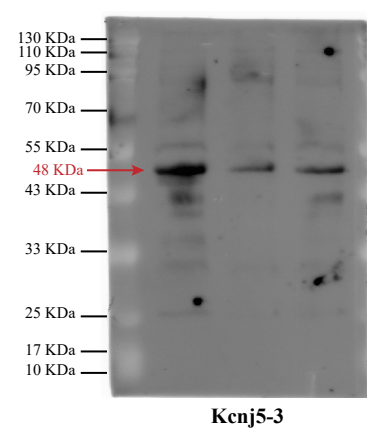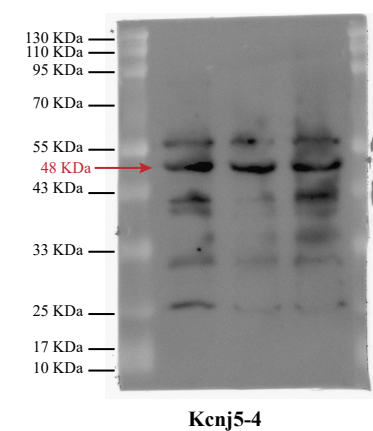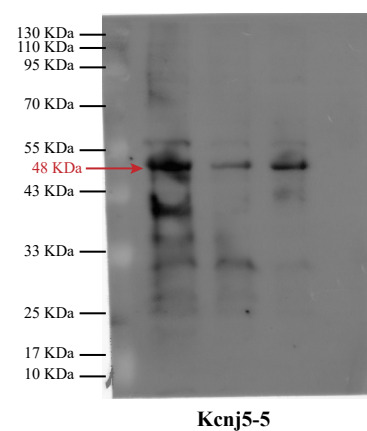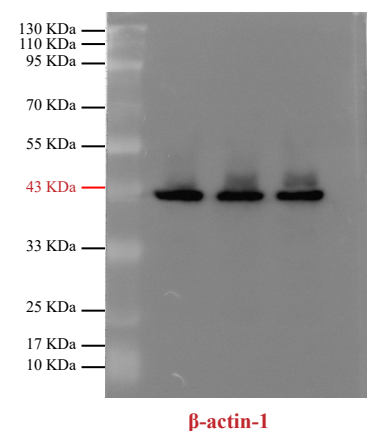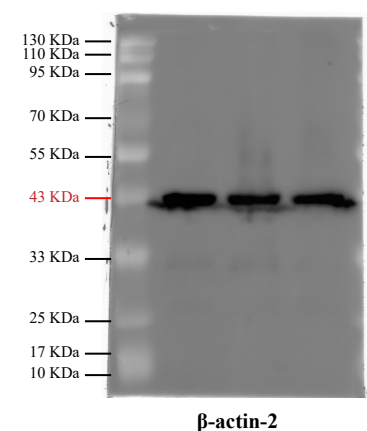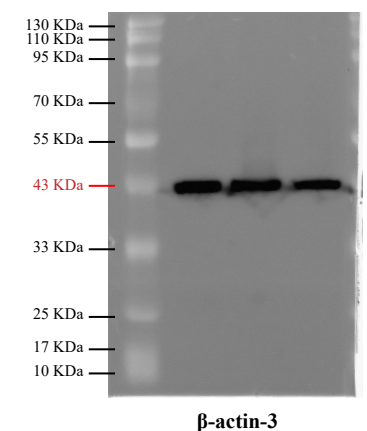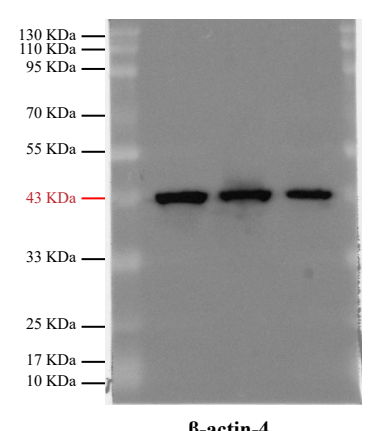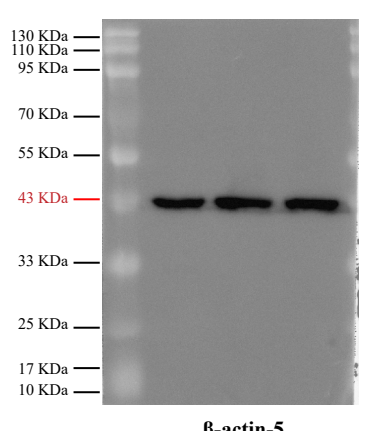

# Full unedited blot for Figure 6N (n = 5)

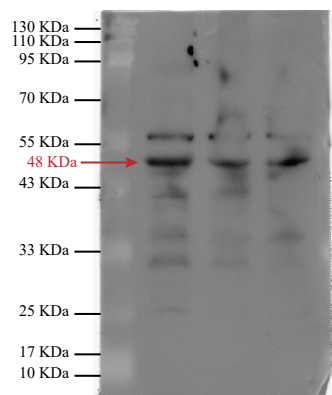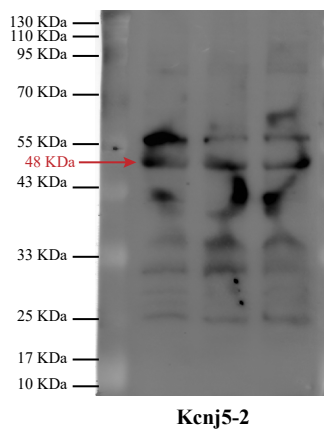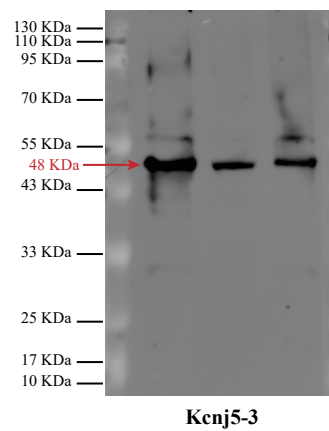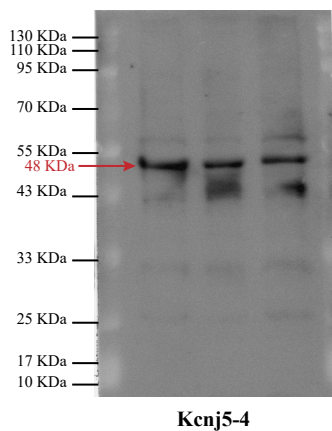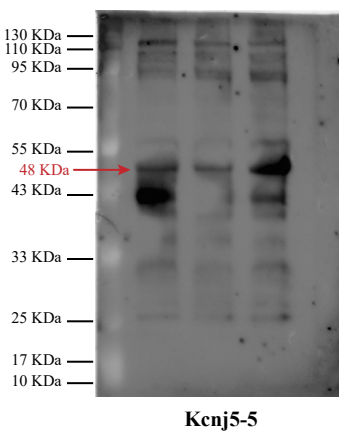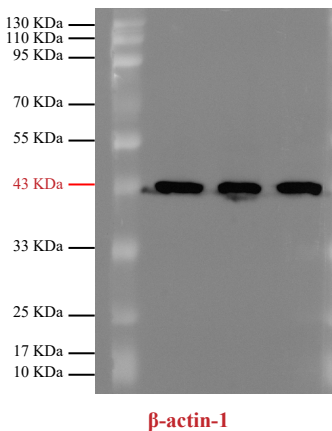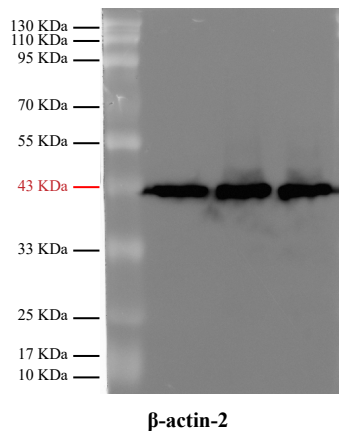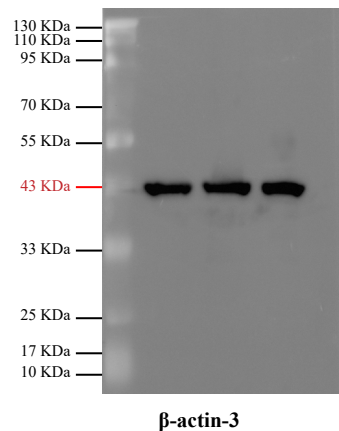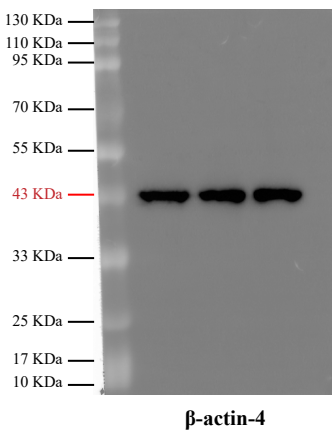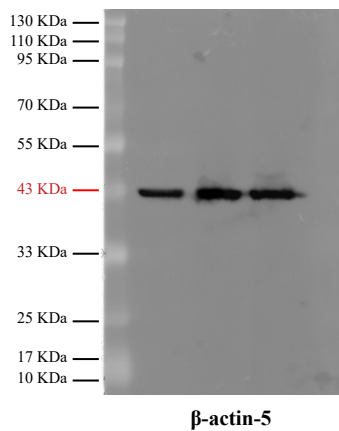

Supplement: CNS-30-e14737-s006.pdf [file CNS-30-e14737-s006.pdf]
